# Supplementary material for: Synthesis of ultra-small gold nanoparticles decorated onto NiO nanobelts and their high electrochemical performance
Source: Royal Society of Chemistry journal article supplement (doi:10.1039/c8dt01735b), 2018-01-01
Supplement: c8dt01735b1.pdf [file c8dt01735b1.pdf]

## Supporting Information

### **Synthesis of Ultra-Small Gold Nanoparticles Decorated into NiO Nanobelts and Its High Electrochemical Performance**

Yongtao Tan <sup>a,b</sup>, Yuan Li <sup>b</sup>, Lingbin Kong <sup>a,b</sup>, Long Kang <sup>a,b</sup>, Fen Ran <sup>a,b,\*</sup>

<sup>a</sup> *State Key Laboratory of Advanced Processing and Recycling of Non-ferrous Metals, Lanzhou University of Technology, Lanzhou 730050, P. R. China*

<sup>b</sup> *School of Material Science and Engineering, Lanzhou University of Technology, Lanzhou 730050, Gansu, P. R. China*

\*Corresponding author: Fen Ran (ranfen@163.com; or ranfen@lut.cn)

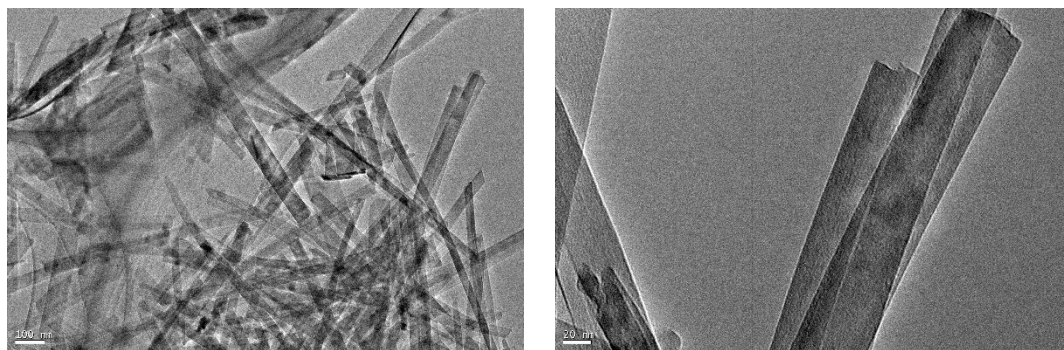

**Fig. S1 TEM images of Ni(OH)<sub>2</sub> nanobelts**

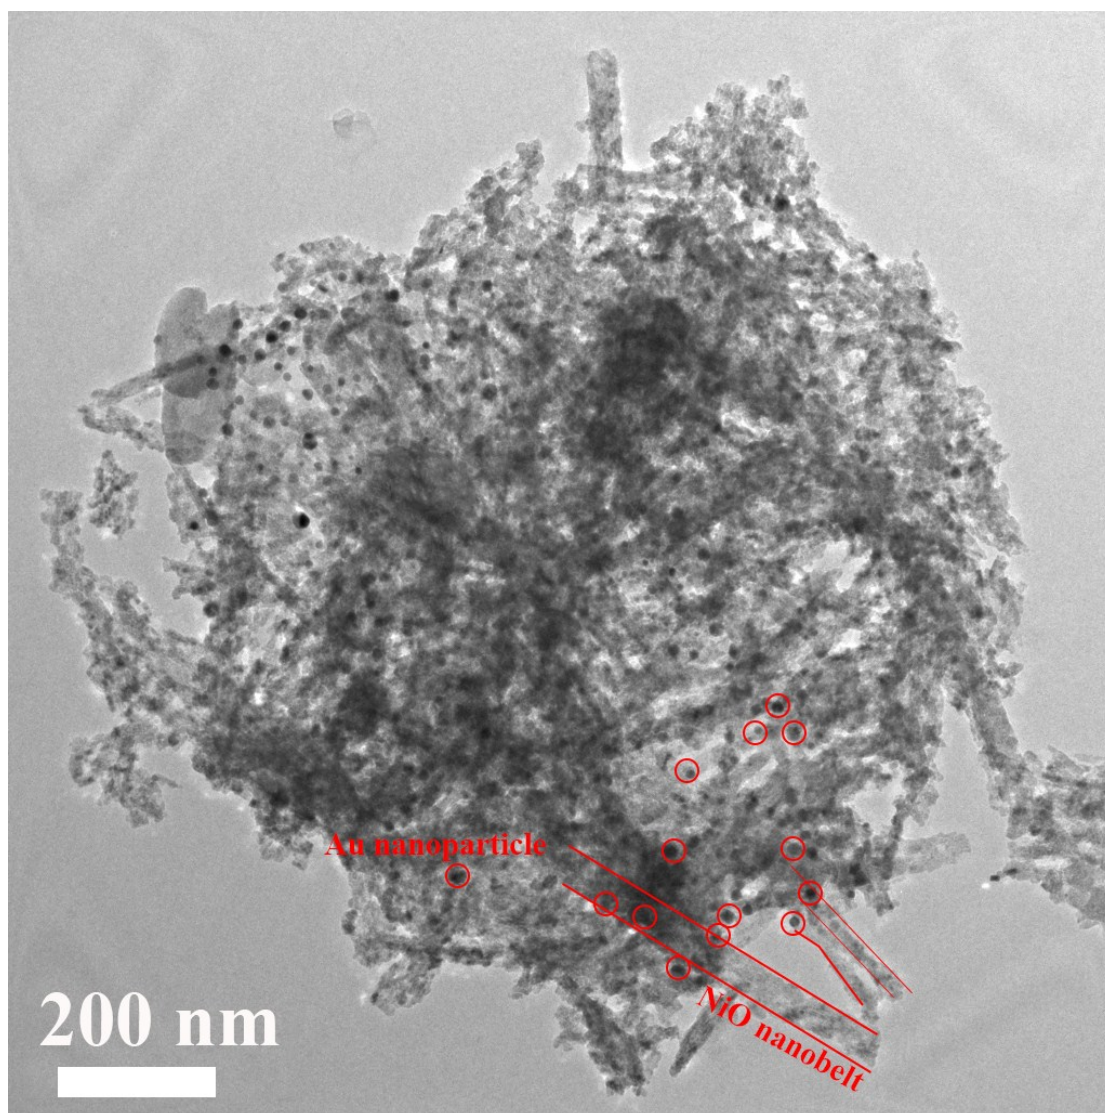

**Fig. S2 TEM image of NiO-AuNP**

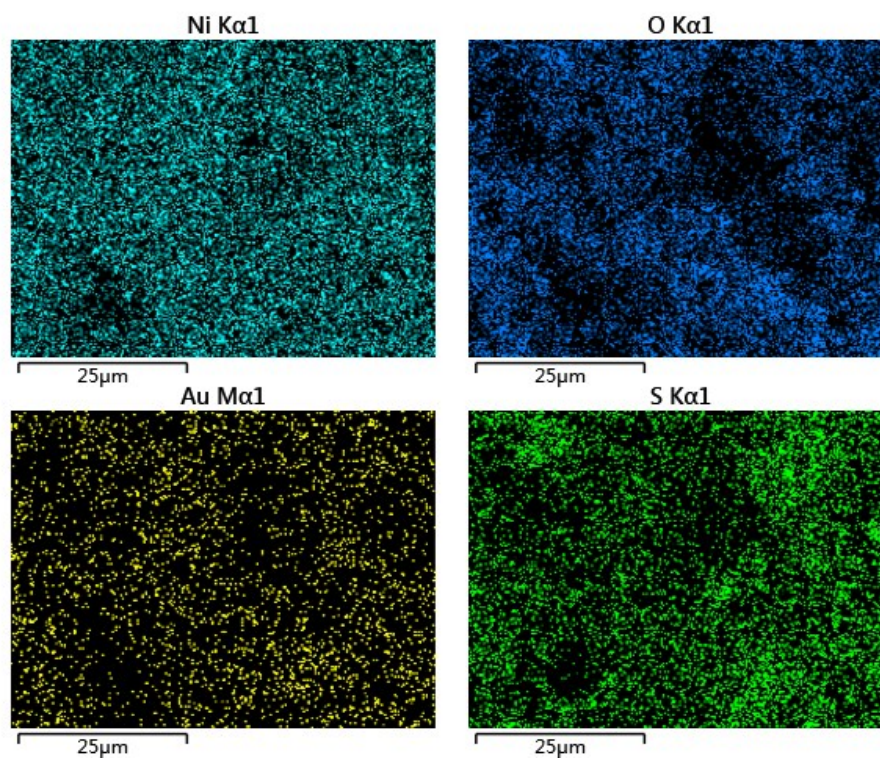

**Fig. S3 Elemental mapping of NiO-AuNP**

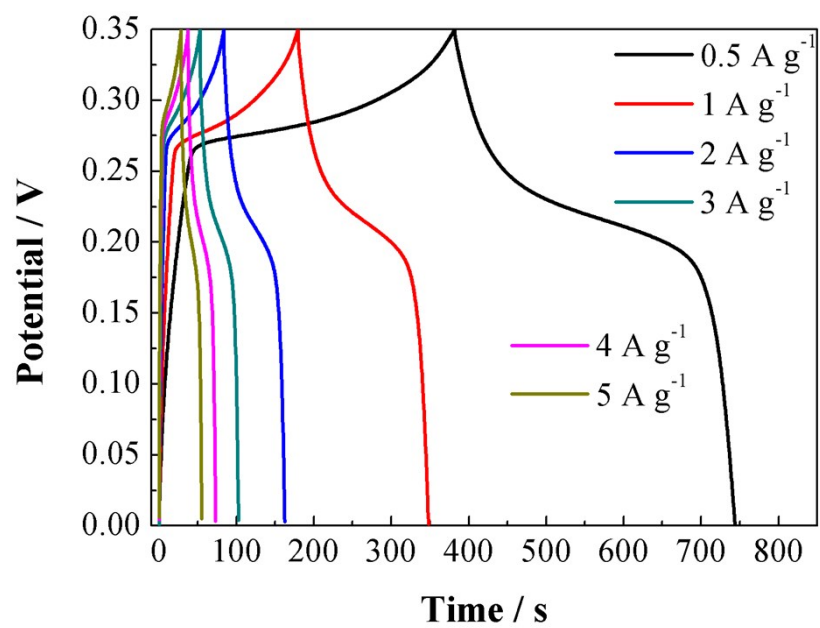

**Fig. S4 GCD curves of NiO**

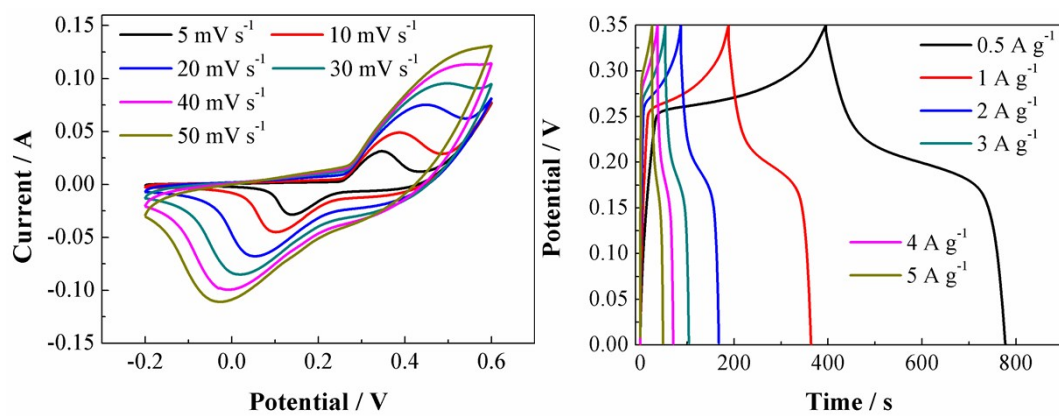

**Fig. S5 CV and GCD curves of NiO-AuNP-1**

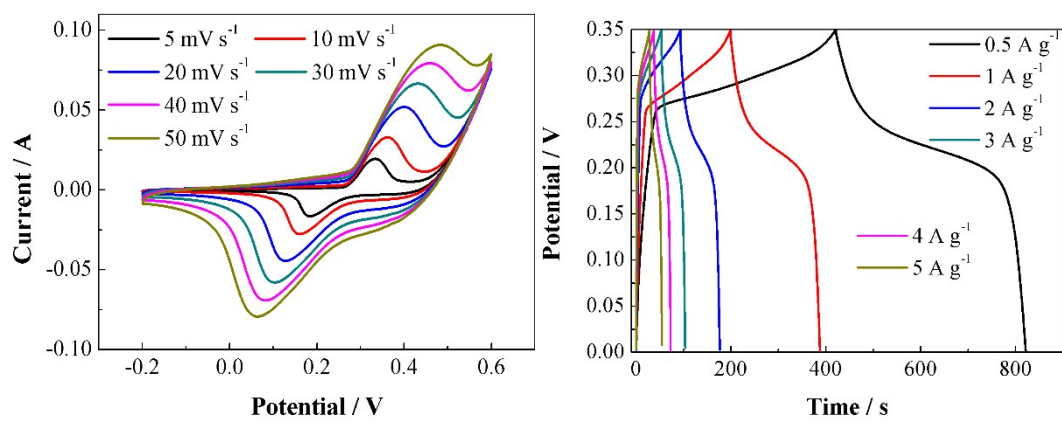

**Fig. S6 CV and GCD curves of NiO-AuNP-3**

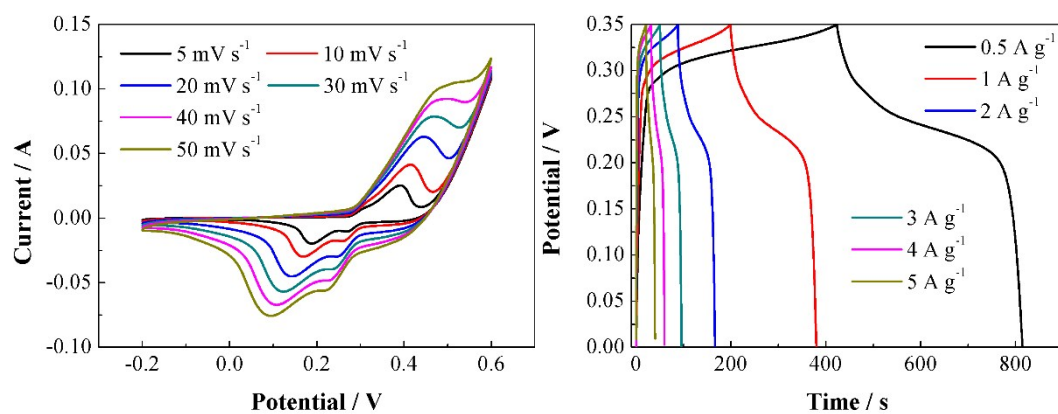

**Fig. S7 CV and GCD curves of NiO-AuNP-4**



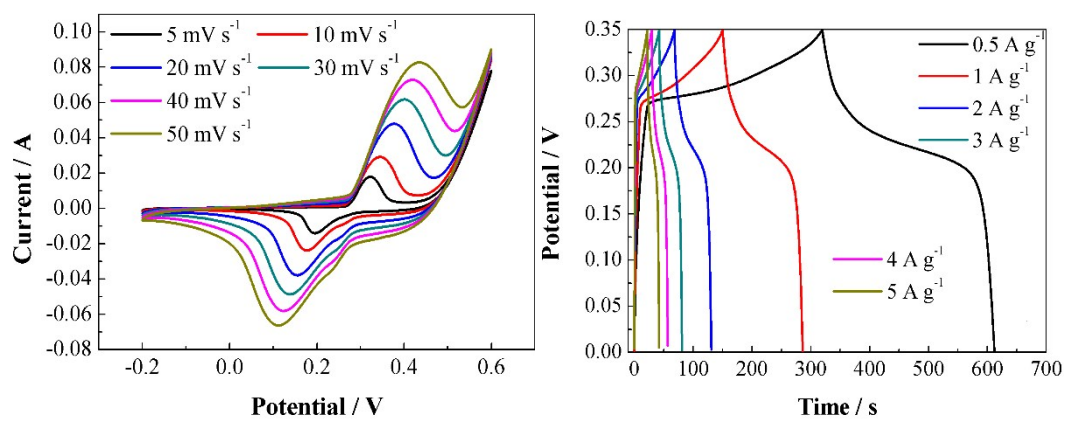

**Fig. S8 CV and GCD curves of NiO-AuNP-5**

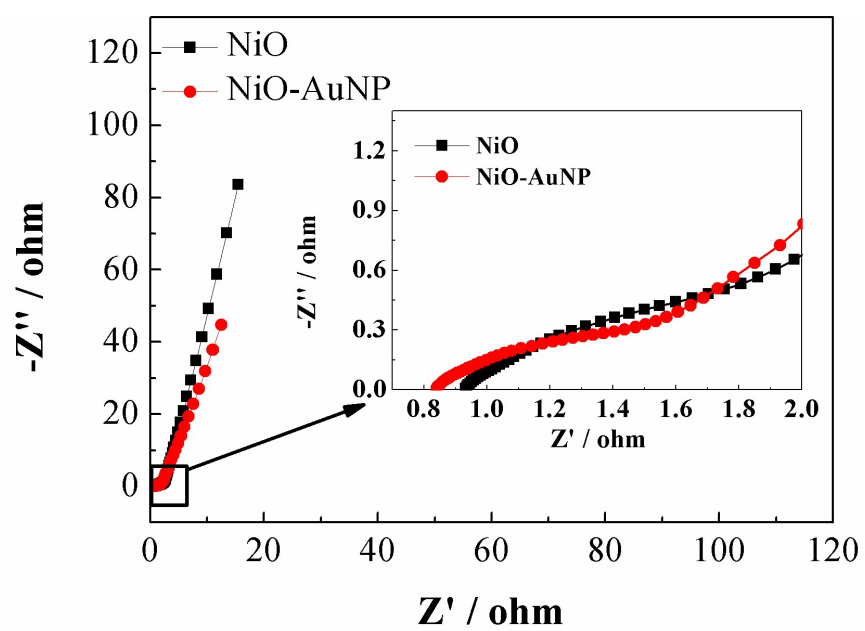

**Fig. S9 EIS of NiO and NiO-AuNP**

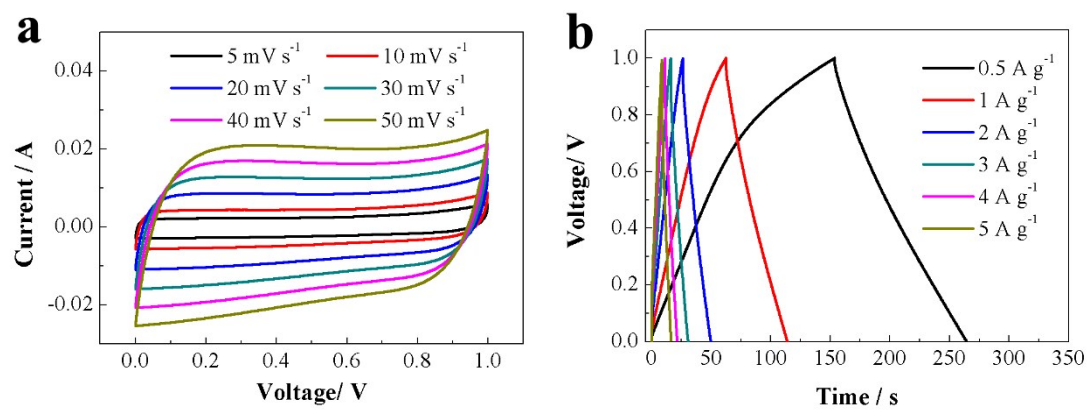

**Fig. S10 Electrochemical performances of AC electrode used two-electrode system**
